# Supplementary material for: Enhancement of E. coli acyl-CoA synthetase FadD activity on medium chain fatty acids
Source: PeerJ. 2015 Jun 30;3:e1040. doi: 10.7717/peerj.1040 (PMC4493641; doi:10.7717/peerj.1040)
Supplement: Figure S2 — XLSX file showing doublings v. time for delta fadR strains expressing the indicated fadD mutants. [file peerj-03-1040-s002.xlsx]

## Sheet: Trial 1-3
	Hours of Growth
Doublings	1	10.67	23.59	25.34	27.34	28.28	30.25	33.17	34.34	36.27	47.77	52.12
WT Trial 1	0	0.281557	0.609959	0.490798	0.616218	0.549113	0.581942	0.624236	0.650868	0.674119	1.13051	1.19183
Trial 2	0	0.375064	0.569888	0.520498	0.590533	0.55518	0.613159	0.655093	0.67677	0.717805	1.16962	1.28403
Trial 3	0	0.324515	0.551625	0.537907	0.591107	0.593448	0.56554	0.602864	0.636715	0.653144	1.14387	1.24314
Q338R Trial 1	0	0.897076	1.56643	1.70223	1.9692	2.09167	2.27284	2.55945	2.76859	2.9838	4.20531	4.84783
Trial 2	0	0.423497	1.56262	1.69502	1.95921	2.04237	2.25932	2.56692	2.77991	2.99689	4.33431	4.91348
Trial 3	0	0.62175	1.69689	1.83241	2.11047	2.1907	2.43425	2.71752	2.91626	3.08489	4.57914	4.9351
H376R Trial 1	0	1.38867	2.74761	2.95202	3.19381	3.21331	3.4504	3.8135	4.09228	4.4192	4.97651	4.93558
Trial 2	0	1.04225	2.8434	3.0375	3.20609	3.2516	3.56321	3.92122	4.2187	4.49944	4.90086	4.84495
Trial 3	0	0.972515	2.74998	2.93859	3.10769	3.16892	3.44678	3.80486	4.09299	4.44677	4.82915	4.79895
H376R Trial 1	0	1.0082	2.8695	3.04451	3.23982	3.28001	3.60917	3.97582	4.28792	4.622	4.97718	4.93144
Trial 2	0	1.14754	2.93051	3.08152	3.26676	3.31837	3.64684	4.02629	4.33786	4.6781	4.93136	4.89969
Trial 3	0	0.982952	2.88763	3.00849	3.22057	3.28683	3.63874	4.01698	4.34758	4.69067	4.837	4.8007
V4F, W5L Trial 1	0	0.987595	2.8865	3.06029	3.27059	3.32727	3.69184	4.06219	4.38334	4.73431	4.9421	4.82832
Trial 2	0	0.98757	2.94227	3.06956	3.26324	3.37452	3.72871	4.14075	4.46446	4.83749	4.86106	4.80993
Trial 3	0	1.08095	2.92323	3.02006	3.25256	3.34664	3.71973	4.09543	4.44972	4.8123	4.79977	4.76119
F447S Trial 1	0	1.03992	2.10826	2.26457	2.62692	2.72898	2.99042	3.19133	3.3407	3.59008	4.9768	4.99027
Trial 2	0	0.780802	2.22139	2.44234	2.73975	2.84045	3.01856	3.23086	3.46352	3.73544	4.88953	4.87261
Trial 3	0	0.581811	1.98335	2.1442	2.48673	2.58032	2.85388	3.05046	3.19677	3.47304	4.75969	4.77433
V451A Trial 1	0	1.02882	2.76893	2.94355	3.19375	3.24479	3.58986	3.97358	4.29017	4.65751	4.92447	4.81919
Trial 2	0	1.00689	2.8629	3.05309	3.21261	3.16039	3.63377	4.02533	4.38819	4.70988	4.85459	4.80197
Trial 3	0	0.978987	2.88616	2.84325	3.17697	3.26402	3.60842	4.01179	4.33965	4.71074	4.81838	4.7702
D372G Trial 1	0	0.853566	2.26965	2.47186	2.8188	2.87157	3.13129	3.32265	3.51492	3.80291	4.97516	4.87149
Trial 2	0	0.704431	2.26059	2.43984	2.77363	2.83986	3.02607	3.26349	3.50294	3.72698	4.9056	4.87381
Trial 3	0	0.819139	2.37722	2.40316	2.90186	2.98251	3.10678	3.36996	3.62706	3.9107	4.91444	4.85894
Y9H Trial 1	0	1.18819	1.81751	1.94686	2.31788	2.34761	2.66036	2.97498	3.17574	3.30552	5.03445	5.04276
Trial 2	0	0.552732	1.62975	1.86378	2.14727	2.18189	2.43554	2.73018	3.02865	3.09684	4.82081	4.87339
Trial 3	0	0.528257	1.75678	1.76907	2.1619	2.19951	2.47877	2.81303	3.03594	3.15644	4.94222	4.87127

## Sheet: Trial 4-6
	Hours of Growth
Doublings	1	8	22.5	26	29.5	34.5	37.83	46.5	53.5	57.33
WT Trial 1	0	0.226068	0.524533	0.361154	0.446169	0.665694	0.76679	1.04504	1.1392	1.30663
Trial 2	0	0.282404	0.458674	0.340247	0.44898	0.6534	0.760462	1.00348	1.07349	1.36093
Trial 3	0	0.188645	0.494181	0.341008	0.430372	0.686644	0.69357	1.03296	1.08907	1.2032
Q338R Trial 1	0	0.66751	1.66391	1.97465	2.37837	3.00656	3.48434	4.35198	4.96501	4.88673
Trial 2	0	0.613282	1.59359	1.88003	2.2693	2.87773	3.31562	4.17112	4.9666	4.99153
Trial 3	0	0.771393	1.7514	2.02171	2.33701	2.97886	3.45901	4.25347	5.16683	5.16066
H376R Trial 1	0	1.03126	3.26329	3.63934	4.06123	5.02729	5.21806	5.13293	5.0084	5.02513
Trial 2	0	1.12164	3.29619	3.65999	4.16125	5.10702	5.19577	5.09435	4.98502	4.99972
Trial 3	0	0.800984	2.96185	3.37092	3.75054	4.77574	4.97712	4.89157	4.77045	4.78143
H376R Trial 1	0	1.09231	3.29829	3.66487	4.22996	5.16472	5.17573	5.07878	4.95573	4.96626
Trial 2	0	1.12226	3.43231	3.74784	4.38754	5.16979	5.11501	5.03504	4.92525	4.9232
Trial 3	0	0.976778	3.27871	3.58562	4.18235	5.01507	5.00348	4.91174	4.80449	4.81637
V4F, W5L Trial 1	0	0.951224	3.34048	3.72134	4.2668	5.15414	5.14582	4.99892	4.93308	4.96478
Trial 2	0	1.06408	3.46357	3.79882	4.43561	5.23773	5.18046	5.02358	4.98921	4.95019
Trial 3	0	1.03839	3.37996	3.70172	4.32522	5.03417	5.07775	4.97952	4.86485	4.89114
F447S Trial 1	0	0.738866	2.46445	2.95	3.43949	3.89018	4.38104	5.19021	5.05546	5.06007
Trial 2	0	0.882074	2.62552	3.12149	3.47665	4.06093	4.64425	5.11487	5.01361	5.02201
Trial 3	0	0.8342	2.53646	3.004	3.45101	3.89661	4.39294	5.10619	4.98162	5.00347
V451A Trial 1	0	1.06206	3.3524	3.72872	4.28307	5.26416	5.25773	5.16024	5.02576	5.03364
Trial 2	0	1.01806	3.30358	3.62882	4.22275	5.09351	5.05889	4.96955	4.85384	4.86907
Trial 3	0	1.05402	3.33148	3.68497	4.2291	5.13897	5.13923	5.02829	4.91039	4.937
D372G Trial 1	0	0.845487	2.87229	3.37658	3.68734	4.33083	4.91685	5.13102	4.99749	5.00534
Trial 2	0	0.935424	2.9462	3.46085	3.73297	4.41903	5.0487	5.14731	5.01652	5.03883
Trial 3	0	0.883665	2.89575	3.40041	3.66677	4.29064	4.9347	5.10807	4.97637	5.01178
Y9H Trial 1	0	0.753738	2.29704	2.77066	3.24613	3.72802	4.04173	5.16731	5.00344	5.0133
Trial 2	0	0.63879	2.17956	2.57516	3.06748	3.61213	3.88474	5.09477	4.94362	4.97102
Trial 3	0	0.73351	2.18303	2.54834	3.03799	3.58869	3.82403	5.17165	5.04459	5.07416
