# Supplementary material for: Enhancement of E. coli acyl-CoA synthetase FadD activity on medium chain fatty acids
Source: PeerJ. 2015 Jun 30;3:e1040. doi: 10.7717/peerj.1040 (PMC4493641; doi:10.7717/peerj.1040)
Supplement: Figure S3 — Raw data used to calculate Vmax and Km values shown in Figs. 3A and 3B. [file peerj-03-1040-s003.xlsx]

## Sheet: AMP Production Assay Oleate
	Oleate Concentration (uM)
uM oleate/s/0.2ug FadD	170	85	42.5	21.25	10.625	5.3125	2.65625	0
WT Trial 1	0.115058	0.103135	0.0721346	0.0496511	0.0358544	0.0205247	0.0102198	-0.000936813
Trial 2	0.0948626	0.0797986	0.0590346	0.0307387	0.0242246	0.00773557	0.00753201	-0.00508919
Trial 3	0.225819	0.191868	0.142655	0.100918	0.0476556	0.0314589	0.00934423	-0.00249179
Trial 4	0.271366	0.232151	0.158428	0.105096	0.0847038	0.0674494	0.0501949	0.0125487
Q338R Trial 1	0.145187	0.0988106	0.0704968	0.052434	0.0337135	0.0151299	0.00838725	0.0011786
Trial 2	0.189947	0.146113	0.105456	0.0851269	0.0609864	0.0393871	0.0279521	-0.0025411
Trial3	0.189788	0.174812	0.124413	0.0895661	0.0696945	0.0636466	0.0345593	-0.000575988
H376R Trial 1	0.17306	0.136419	0.0800849	0.052455	0.0322249	0.0145012	-0.00978683	0.000477407
Trial 2	0.147882	0.11286	0.060517	0.051315	0.0274979	0.0121251	0.0116379	-0.00470929
Trial 3	0.278647	0.205132	0.123711	0.105135	0.069563	0.0379435	0.0245051	-0.00276671
V4F W5L Trial 1	0.0577625	0.0464816	0.0281603	0.0164665	0.0137873	0.00923633	0.00522408	-0.00317725
Trial 2	0.049481	0.0367718	0.0232606	0.0168392	0.0152489	0.00859555	0.00213866	-0.000561944
Trial 3	0.133078	0.0881501	0.0551624	0.0443492	0.0363688	0.0192809	0.00886375	0.00207125
F447S Trial 1	0.079616	0.0696267	0.038805	0.0317745	0.0238174	0.00240395	-0.00448818	-0.000589229
Trial 2	0.0653713	0.0476641	0.0298893	0.0213737	0.0137535	0.00331165	0.0022303	-0.000321027
Trial 3	0.161138	0.116976	0.0739998	0.0662733	0.0453588	0.0371519	0.0204928	-0.0373578
V451A Trial 1	0.0767086	0.0727533	0.0593731	0.0306202	0.0147666	0.00822357	0.00170336	-0.0121868
Trial 2	0.0610327	0.0565056	0.0466129	0.0367202	0.0233065	0.0172703	0.00234741	0.000503017
Trial 3	0.169482	0.158721	0.124133	0.088392	0.0668705	0.038047	0.0149882	-0.000384313
D372G Trial 1	0.0903609	0.0740913	0.0530444	0.0366417	0.021305	0.0117411	-0.00296156	-0.00098763
Trial 2	0.0793606	0.0676161	0.0386409	0.0283966	0.00885118	0.0090012	0.00572219	-0.000985845
Trial 3	0.128852	0.0905297	0.0649814	0.0533181	0.040544	0.0283252	0.0205497	-0.00499857
Trial 4	0.231588	0.182178	0.132096	0.0789885	0.0598296	0.0450403	0.0319315	0.0094114
Y9H Trial 1	0.0537926	0.0526503	0.0360348	0.0228982	0.0166155	0.00680196	0.00706157	-0.00327117
Trial 2	0.0868338	0.0704886	0.0546542	0.0423953	0.0352443	0.024007	0.0188991	-1.96853e-16
Trial 3	0.154593	0.118918	0.0891884	0.0772966	0.0594589	0.0356754	0.0237836	0.0237836

## Sheet: AMP Production Assay Octanoate
	Octanoate Concentration (uM)
uM octanoate/s/0.2ug FadD	816	408	204	102	51	25.5	12.75	6.375
WT Trial 1	0.0488549	0.0345558	0.0220169	0.0155858	0.00167046	0.00510965	0.000849704	-0.00202426
Trial 2	0.0444888	0.033015	0.0233178	0.0139351	0.00649566	0.00379376	-0.00201717	-0.000499666
Trial 3	0.0815688	0.0616134	0.0397586	0.0246978	0.0159531	0.00798124	0.00253161	0.000529272
Trial 4	0.135526	0.103527	0.0677631	0.0432931	0.0329404	0.0216465	0.0225877	0.00941154
Q338R Trial 1	0.114129	0.0851368	0.0603436	0.0387162	0.0240018	0.0109025	0.00573393	-0.00138907
Trial 2	0.200336	0.172256	0.126208	0.0864487	0.0532348	0.0288505	0.016068	-0.00467152
Trial 3	0.14806	0.112935	0.0757012	0.0522503	0.0311136	0.0108512	0.00920552	-0.00704556
H376R Trial 1	0.102593	0.0771488	0.045596	0.0302325	0.0168455	-0.00192384	0.00688256	-0.00554811
Trial 2	0.0667592	0.0389428	0.02347	0.0121429	-0.00260778	-0.00152455	5.64987e-17	-0.00045469
Trial 3	0.173141	0.125712	0.0782823	0.0308291	0.0311165	0.0163847	0.00675508	-0.00359313
V4F W5L Trial 1	0.0757561	0.0600955	0.0430477	0.0184556	0.0139636	0.0053593	0.00144274	-0.00132555
Trial 2	0.0566799	0.0391969	0.0228978	0.0137512	0.00852463	0.000750167	0.00181404	-0.00151397
Trial 3	0.18012	0.126835	0.0758104	0.0437647	0.0267151	0.0138139	-0.00566244	-0.000871145
F447S Trial 1	0.0521888	0.0352378	0.0209267	0.0131634	0.00120876	-0.00524202	0.000721727	-0.00271326
Trial 2	0.0394402	0.0313225	0.0214147	0.0115068	0.00558941	-0.000990787	0.00128461	-0.00228223
Trial 3	0.0911588	0.065332	0.0412995	0.0167375	0.0112956	0.00791279	-0.00688324	-0.00129428
V451A Trial 1	0.112698	0.080452	0.056556	0.0371045	0.0153894	0.00796985	0.00608904	-0.0038671
Trial 2	0.106975	0.087525	0.0717638	0.0536552	0.0310194	0.0238095	0.0139168	0.000503017
Trial 3	0.287686	0.236352	0.183235	0.137255	0.0835881	0.0491372	0.0212745	-0.00384313
D372G Trial 1	0.0934604	0.0646846	0.0436325	0.0242707	0.0118911	0.00686066	-0.00130732	-0.0212964
Trial 2	0.135114	0.114692	0.0622411	0.0392562	0.0194206	0.00921593	0.00502909	0.0431623
Trial 3	0.13368	0.0947862	0.0645353	0.0458085	0.0285223	0.019303	0.0181506	0.00172862
Y9H Trial 1	0.0552983	0.0515154	0.0363834	0.0263696	0.0175798	0.00912367	0.00678712	-0.0205839
Trial 2	0.116807	0.107209	0.0695176	0.0418733	0.026662	0.013331	0.00878442	6.55965e-17
Trial 3	0.182624	0.138879	0.10108	0.0649801	0.0382236	0.0248453	0.0167759	0.000212353
