# Supplementary material for: Enhancement of E. coli acyl-CoA synthetase FadD activity on medium chain fatty acids
Source: PeerJ. 2015 Jun 30;3:e1040. doi: 10.7717/peerj.1040 (PMC4493641; doi:10.7717/peerj.1040)
Supplement: Figure S5 — Spreadsheets contain all doublings v time data for the graphs in Fig. 4. [file peerj-03-1040-s005.xlsx]

## Sheet: Charge Mutants
Doublings	Hours of Growth
3_11_2014	9.36	23.4	25.29	28.78	30.25	32.1	34.47	36.47	37.75	47.8
F447-R447 Trial 1	0	1.59959	1.95974	2.31953	2.54289	2.78366	3.13507	3.40322	3.42743	3.43509
Trial 2	0	1.51332	1.8946	2.21988	2.4668	2.69699	3.05271	3.3329	3.35707	3.35219
Trial 3	0	1.30704	1.7788	2.09198	2.35008	2.62535	2.94245	3.2272	3.29535	3.31186
Trial 4	0	1.41674	1.81478	2.14337	2.41193	2.65768	3.01968	3.25305	3.29015	3.29586
Trial 5	0	1.02595	1.49862	1.83789	2.07176	2.33571	2.70746	2.95647	3.11077	3.13907
Trial 6	0	1.49982	1.8344	2.14775	2.37984	2.62742	2.97022	3.24248	3.31467	3.31719
S379-R379 Trial 1	0	1.13408	1.59164	1.94932	2.06486	2.33369	2.72971	3.04825	3.12511	3.45733
Trial 2	0	1.15766	1.60371	1.95815	2.11087	2.35875	2.83236	3.23155	3.47168	3.51395
Trial 3	0	1.06887	1.56089	1.91413	2.05895	2.31945	2.69749	2.98965	3.12892	3.35174
Trial 4	0	1.04835	1.4701	1.87515	2.01082	2.27923	2.63739	2.92394	3.07588	3.30266
Trial 5	0	1.19331	1.6305	1.95389	2.15063	2.40494	2.75989	3.00556	3.16685	3.30341
Trial 6	0	1.07331	1.5108	1.9555	2.06383	2.32834	2.71981	2.96319	3.1714	3.40905
S379-R379 F447-R447 Trial 1	0	0.797426	1.14909	1.5671	1.81734	1.92022	2.19847	2.53282	2.63945	3.51457
Trial 2	0	0.806483	1.07327	1.53462	1.73237	1.84434	2.13379	2.45542	2.54261	3.44648
Trial 3	0	0.616985	0.925333	1.34045	1.5533	1.76686	1.9921	2.31628	2.50352	3.43484
Trial 4	0	0.75409	1.13338	1.52615	1.74358	1.88765	2.18423	2.49929	2.68059	3.40817
Trial 5	0	0.626771	0.920586	1.38859	1.59396	1.71849	2.02501	2.32486	2.48941	3.25998
Trial 6	0	0.632898	0.985055	1.41059	1.61016	1.771	2.06172	2.39691	2.55275	3.33828
S379-R379 F447-D447 Trial 1	0	0.675659	0.956963	1.33592	1.54564	1.78808	2.02978	2.24384	2.39237	3.54249
Trial 2	0	0.604256	0.849971	1.21787	1.40454	1.58716	1.89303	2.10586	2.27494	3.46901
Trial 3	0	0.624222	0.876946	1.27076	1.46353	1.66983	1.94242	2.15712	2.34454	3.43365
Trial 4	0	0.616351	0.898606	1.27351	1.45841	1.67777	1.91727	2.16531	2.34706	3.40553
Trial 5	0	0.56315	0.781385	1.15117	1.31872	1.54762	1.84993	2.052	2.24905	3.37798
Trial 6	0	0.576059	0.869603	1.23527	1.4415	1.63455	1.90555	2.1234	2.32812	3.36894
F447-D447 Trial 1	0	1.04098	1.48962	1.92305	2.01325	2.24486	2.62428	2.90687	3.05865	3.45312
Trial 2	0	1.0966	1.50998	1.92855	2.02799	2.2136	2.6265	2.92343	3.01075	3.37922
Trial 3	0	1.00005	1.47226	1.88619	1.97775	2.21256	2.55917	2.90443	3.02616	3.37368
Trial 4	0	0.995493	1.44718	1.86969	1.96576	2.21989	2.57277	2.86459	3.01788	3.33967
Trial 5	0	0.962582	1.41611	1.82963	1.93291	2.1601	2.51408	2.79046	2.96805	3.27969
Trial 6	0	1.01559	1.45482	1.86525	1.95376	2.17936	2.54369	2.80399	2.97253	3.30469
WT Trial 1	0	0.740437	1.05514	1.48056	1.66137	1.83213	2.0921	2.32655	2.49529	3.45853
Trial 2	0	0.702101	1.00988	1.42798	1.62338	1.82257	2.01437	2.30877	2.45532	3.45147
Trial 3	0	0.68417	0.971209	1.39247	1.5853	1.77881	1.9251	2.26812	2.44767	3.42258
Trial 4	0	0.693123	0.979179	1.41065	1.57367	1.77551	1.93596	2.22542	2.41314	3.4005
Trial 5	0	0.761338	1.12573	1.48054	1.66194	1.81954	1.97431	2.29885	2.47107	3.40182
Trial 6	0	0.677916	0.921933	1.37288	1.5392	1.75084	1.94879	2.19135	2.34503	3.38805

## Sheet: Charge Mutants 2
9_18_2014	Hours of Growth
Doublings	1	8.65	23.2	25.97	28.74	32.55	35.45	47.57	54.5
F447R	0	1.07731	3.41574	3.76501	4.26638	5.1358	5.3507	5.21197	5.14279
Trial 2	0	0.823403	3.29178	3.58481	4.23346	4.93106	5.26929	5.08651	4.99109
Trial 3	0	0.800795	3.03847	3.41361	3.77324	4.58544	5.14032	4.98037	4.95689
Trial 4	0	0.860177	3.06677	3.34722	3.88575	4.74202	4.99195	4.81968	4.75221
Trial 5	0	0.696669	3.06221	3.40246	3.92348	4.76888	5.01945	4.79112	4.73532
Trial 6	0	0.71819	2.94224	3.34128	3.76486	4.59305	4.96802	4.76084	4.74741
S379R	0	0.991117	3.15718	3.68494	3.99257	4.7563	5.35768	5.29595	5.21676
Trial 2	0	0.525998	2.66813	3.07478	3.42968	4.13479	4.73507	4.68227	4.62315
Trial 3	0	0.770323	2.86908	3.44187	3.69515	4.34976	4.97467	5.02004	5.01988
Trial 4	0	0.755237	2.75247	3.35585	3.642	4.33892	4.89191	5.13194	5.05537
Trial 5	0	0.610623	2.78487	3.2829	3.56701	4.32414	4.90336	4.82256	4.77022
Trial 6	0	0.614685	2.61649	3.20629	3.46864	4.2328	4.81895	4.77366	4.78865
F447R S379R	0	0.517532	2.23692	2.84268	3.32227	3.78233	4.24824	5.29963	5.16006
Trial 2	0	1.71408	2.29934	2.69365	3.37909	3.56427	3.97302	5.27061	5.13493
Trial 3	0	0.481002	2.1429	2.69642	3.15039	3.58057	4.02613	5.02122	4.98896
Trial 4	0	0.464476	2.00537	2.58541	3.09195	3.46095	3.92495	4.96277	4.86522
Trial 5	0	0.291793	1.83646	2.42569	2.92583	3.36286	3.73	4.88697	4.74609
Trial 6	0	0.444218	1.93793	2.43934	2.89539	3.3791	3.74298	4.85796	4.82973
F447D S379R	0	0.366498	2.0608	2.67889	3.13433	3.65852	3.96785	5.28435	5.1754
Trial 2	0	0.380354	1.85951	2.25962	3.16582	3.2669	3.60357	5.26742	5.17664
Trial 3	0	0.402524	1.66461	2.04644	2.49449	3.09012	3.43453	4.91907	4.88387
Trial 4	0	0.319261	1.67318	2.07288	2.54375	3.20991	3.49645	5.07932	4.98675
Trial 5	0	0.449229	1.72082	2.21294	2.68373	3.26565	3.53157	5.05524	4.90604
Trial 6	0	0.34249	1.5793	2.03407	2.56451	3.14119	3.42849	4.99144	4.91341
F447D	0	0.88769	3.10254	3.6242	3.93239	4.56289	5.14292	5.42956	5.299
Trial 2	0	0.683124	2.75754	3.34296	3.72321	4.16204	4.73456	5.15155	5.0626
Trial 3	0	0.581966	2.49079	3.0321	3.41045	3.90173	4.43294	4.82637	4.84609
Trial 4	0	0.643803	2.35274	2.93445	3.37138	3.78279	4.32494	4.86811	4.77504
Trial 5	0	0.582867	2.31731	2.84114	3.21851	3.70329	4.22051	4.75664	4.65557
Trial 6	0	0.556173	2.34207	3.00243	3.32142	3.93256	4.46613	4.81941	4.81622
WT	0	0.86536	2.63232	3.11877	3.49596	4.02594	4.27989	5.79847	5.80669
Trial 2	0	0.559303	2.60487	3.03436	3.4774	3.81275	4.19687	5.30823	5.33027
Trial 3	0	0.388374	2.06542	2.69638	3.0479	3.50577	3.78565	5.00531	4.99935
Trial 4	0	0.47463	2.07602	2.53885	2.95253	3.49312	3.69503	5.20449	5.19958
Trial 5	0	0.412371	2.17952	2.62646	3.02378	3.48925	3.75278	5.13757	5.12205
Trial 6	0	0.327294	2.11054	2.69627	3.15416	3.53026	3.80478	5.12528	5.12983

## Sheet: Charge Mutants 3
10_9_2014	Hours of Growth
Doublings	1	5.75	20.11	21.91	25	26.5	28.91	30.25	34.25	44.15	45.81
F447R	0	0.928675	3.43058	3.78153	3.99145	4.28449	4.75307	5.0087	5.68197	5.60893	5.65247
Trial 2	0	0.677734	3.04515	3.34898	3.62987	3.88601	4.34507	4.56281	5.3708	5.35322	5.36149
Trial 3	0	0.356205	2.90943	2.95578	3.43304	3.74888	4.24647	4.51835	4.65082	4.53913	4.56894
Trial 4	0	0.738918	3.26908	3.40717	3.81828	4.16202	4.62443	4.87738	5.28343	5.15114	5.17552
Trial 5	0	0.583083	3.15144	3.38971	3.64937	3.9885	4.44533	4.67927	5.33963	5.22345	5.24242
Trial 6	0	0.923697	3.04571	3.44021	3.78678	3.9192	4.40463	4.6337	5.38808	5.35846	5.38609
S379R	0	0.838642	3.02611	3.31223	3.77002	3.95516	4.19681	4.41558	5.12097	5.71928	5.77673
Trial 2	0	0.808259	2.84365	3.1576	3.68524	3.81812	4.06735	4.24751	4.97509	5.58909	5.56719
Trial 3	0	0.585681	2.64448	2.99015	3.56005	3.56753	3.86564	4.09379	4.77102	5.27664	5.26213
Trial 4	0	0.744178	2.6781	2.98389	3.4645	3.62172	3.8433	4.01652	4.7383	5.41169	5.38576
Trial 5	0	0.628834	2.7873	3.15039	3.55332	3.73563	3.95288	4.18066	4.88846	5.38017	5.36586
Trial 6	0	0.762709	2.5517	2.86614	3.35913	3.51023	3.73475	3.99411	4.7161	5.0883	5.06595
F447R S379R	0	0.700738	2.39813	2.6471	3.11772	3.43238	3.78867	3.91343	4.23516	5.71112	5.71698
Trial 2	0	0.599603	2.15179	2.39393	2.82063	3.40334	3.76291	3.83143	4.21226	5.65068	5.63425
Trial 3	0	0.612287	2.13805	2.38121	2.86338	3.09936	3.47103	3.5747	3.92145	5.33709	5.3509
Trial 4	0	0.580129	2.10438	2.29425	2.76722	3.05525	3.41966	3.47157	3.84183	5.29062	5.29889
Trial 5	0	0.482996	2.30188	2.55742	3.0588	3.25287	3.45827	3.596	4.25574	4.74103	4.75073
Trial 6	0	0.754239	2.11354	2.4322	2.8278	3.1084	3.45248	3.56611	3.86729	5.31682	5.28386
F447D S379R	0	0.509429	2.11565	2.34868	2.77223	3.08122	3.39617	3.57361	3.91428	5.38611	5.54195
Trial 2	0	0.599603	2.15179	2.39393	2.82063	3.12709	3.46956	3.67747	3.99417	5.45109	5.58779
Trial 3	0	0.568305	1.96083	2.24043	2.68848	2.89097	3.24775	3.42277	3.72259	5.17943	5.29913
Trial 4	0	0.700805	2.10389	2.30383	2.76405	3.02111	3.38187	3.53307	3.88789	5.25691	5.47221
Trial 5	0	0.349183	2.04208	2.15783	2.53121	2.84869	3.1669	3.31657	3.64648	5.11927	5.16688
Trial 6	0	0.88591	2.07335	2.2915	2.70418	2.96596	3.32111	3.48055	3.7944	5.20145	5.24578
F447D	0	0.81689	2.83638	3.12895	3.63987	3.92291	4.11822	4.24517	4.83791	5.86278	5.85988
Trial 2	0	0.739737	2.62091	2.8916	3.39513	3.68993	3.91025	4.0017	4.60907	5.60777	5.59793
Trial 3	0	0.763578	2.80272	3.04957	3.49714	3.62434	3.87307	4.08354	4.75992	5.27267	5.28661
Trial 4	0	0.590127	2.6139	2.91872	3.30922	3.46705	3.80864	4.03191	4.73439	5.014	5.05861
Trial 5	0	0.651046	2.66623	2.97213	3.46628	3.67086	3.892	4.01028	4.672	5.49281	5.46696
Trial 6	0	0.681315	2.52165	2.88172	3.39037	3.5492	3.77422	3.91489	4.60032	5.29018	5.28831
WT	0	0.516854	2.22615	2.43428	2.92988	3.1967	3.57361	3.75005	4.05153	5.60414	5.66203
Trial 2	0	0.486602	2.12116	2.37522	2.79912	3.11417	3.44545	3.65467	3.91619	5.43189	5.46051
Trial 3	0	0.525019	2.0254	2.31058	2.87059	2.96561	3.33996	3.50491	3.81861	5.2962	5.35972
Trial 4	0	0.657346	2.10984	2.47274	2.72454	3.02534	3.39882	3.52692	3.84631	5.33929	5.3651
Trial 5	0	0.503071	2.1238	2.45192	2.82848	3.09315	3.44357	3.61493	3.91866	5.32976	5.34966
Trial 6	0	0.771888	2.2007	2.50817	2.94289	3.19684	3.62245	3.68012	3.96823	5.35412	5.35863

## Sheet: Glycine Mutants
Doublings (Glycine Muts)	Hours of Growth
5_1_2014	9.37	24	29.8	34.25	48.13
L459	0	1.30817	2.01107	2.50805	3.76438
Trial 2	0	1.36385	2.04569	2.57559	3.94856
Trial 3	0	1.38027	1.98572	2.55247	3.91209
Trial 4	0	1.29079	1.969	2.53796	3.89888
Trial 5	0	1.44535	2.18007	2.78495	4.15249
Trial 6	0	1.38671	2.09746	2.69593	4.05488
Q338	0	1.63094	2.40273	2.93074	4.26132
Trial 2	0	1.61267	2.42855	2.91487	4.24566
Trial 3	0	1.65244	2.42101	2.89852	4.20361
Trial 4	0	1.38268	2.20757	2.67157	4.04383
Trial 5	0	1.54073	2.3593	2.82861	4.17547
Trial 6	0	1.51904	2.32591	2.81359	4.13661
Q339	0	1.81774	2.6565	3.15794	4.66084
Trial 2	0	1.84002	2.69262	3.06957	4.21437
Trial 3	0	1.82591	2.70581	3.0949	4.22611
Trial 4	0	1.75551	2.6616	3.05961	4.29274
Trial 5	0	1.7301	2.63174	3.02526	4.19771
Trial 6	0	1.70408	2.6091	3.0614	4.32134
R449	0	1.92071	2.76575	3.14278	4.56718
Trial 2	0	1.91012	2.78894	3.11577	4.12107
Trial 3	0	1.85408	2.68603	3.08036	4.03155
Trial 4	0	1.91828	2.75193	3.15046	4.11826
Trial 5	0	1.87083	2.72534	3.13746	4.07939
Trial 6	0	1.84164	2.70936	3.04111	4.11292
D551	0	1.85249	2.72299	3.09962	4.52529
Trial 2	0	1.91431	2.78021	3.12665	4.10231
Trial 3	0	1.93446	2.75834	3.14361	4.11209
Trial 4	0	1.76218	2.50818	2.97478	3.78414
Trial 5	0	1.86645	2.75383	3.13247	4.14865
Trial 6	0	1.8633	2.74692	3.08604	4.10229
R554	0	1.84904	2.72537	3.15332	4.61345
Trial 2	0	1.86537	2.73714	3.09251	4.20731
Trial 3	0	1.91753	2.75895	3.12243	4.14003
Trial 4	0	1.89379	2.72534	3.10667	4.08161
Trial 5	0	1.98402	2.77269	3.146	4.10223
Trial 6	0	1.75428	2.65203	2.97781	4.15279
S379	0	2.08461	2.90957	3.36201	4.49876
Trial 2	0	2.19783	2.88509	3.41293	3.97854
Trial 3	0	2.10305	2.78218	3.33809	3.96055
Trial 4	0	2.14778	2.84216	3.37546	4.0206
Trial 5	0	2.12948	2.83396	3.39605	4.00697
Trial 6	0	2.09299	2.89163	3.38945	4.31734
H376	0	2.3877	3.0278	3.63973	4.30542
Trial 2	0	2.46688	3.08008	3.64376	3.79187
Trial 3	0	2.42249	3.07071	3.64084	3.80042
Trial 4	0	2.37125	3.01883	3.60365	3.87319
Trial 5	0	2.37808	3.10373	3.66209	3.76515
Trial 6	0	2.16585	2.83026	3.41226	3.66673
Y371	0	2.41651	3.02258	3.55986	3.98324
Trial 2	0	2.36159	2.96051	3.4412	3.7093
Trial 3	0	2.33363	2.94069	3.51113	3.95131
Trial 4	0	2.37075	2.98076	3.54834	3.97106
Trial 5	0	2.35614	3.0744	3.61557	3.61678
Trial 6	0	2.39157	3.07004	3.60315	3.60499
V451	0	2.55866	3.49802	3.97392	3.94779
Trial 2	0	2.41881	3.32483	3.54007	3.47324
Trial 3	0	2.47454	3.36791	3.48866	3.42019
Trial 4	0	2.43107	3.36153	3.51803	3.4332
Trial 5	0	2.41563	3.38729	3.569	3.4871
Trial 6	0	2.42825	3.35564	3.46764	3.40334
WT	0	1.71459	2.57422	3.07666	4.61767
Trial 2	0	1.8268	2.68759	3.08049	4.28493
Trial 3	0	1.82006	2.68017	3.0503	4.24146
Trial 4	0	1.84266	2.71582	3.04963	4.19304
Trial 5	0	1.78861	2.64851	3.00246	4.18812
Trial 6	0	1.75029	2.56826	2.98079	4.24893

## Sheet: Glycine Mutants 2
Doublings (Glycine Muts)	Hours of Growth
9_18_2014	1	8.65	23.2	25.97	28.74	32.55	35.45	47.57	54.5
L459	0	0.410396	2.00528	2.43614	2.82584	3.45538	3.84901	5.42112	5.70582
Trial 2	0	0.284304	1.69044	2.12143	2.53757	3.01592	3.54622	5.05127	5.26814
Trial 3	0	0.166188	1.46342	1.8309	2.27341	2.86051	3.31626	4.79007	5.13091
Trial 4	0	0.188348	1.66467	2.0984	2.49259	3.03747	3.37686	5.05943	5.06364
Trial 5	0	-0.0761823	1.22106	1.5961	1.95504	2.54345	3.00264	4.41171	4.9875
Trial 6	0	0.0820449	1.33754	1.69883	2.10611	2.68775	3.14555	4.59912	4.91682
Q338	0	0.747991	2.3576	2.80972	3.16374	3.79818	4.20815	5.70282	6.00359
Trial 2	0	0.652212	1.82922	2.20852	2.55934	3.09983	3.58366	5.13112	5.16578
Trial 3	0	0.367535	1.85566	2.25284	2.65225	3.15206	3.60314	5.16726	5.12167
Trial 4	0	0.359932	1.73995	2.1105	2.52167	3.08235	3.48238	5.07678	5.15289
Trial 5	0	0.220726	1.69751	2.2115	2.53	3.06896	3.48002	5.09691	5.21764
Trial 6	0	0.23835	1.63338	1.99933	2.41759	3.03919	3.3801	4.95675	4.90577
Q339	0	0.635971	2.57387	3.03953	3.50947	3.94613	4.26547	5.67822	5.74384
Trial 2	0	0.503218	2.28618	2.81082	3.25531	3.72588	4.06301	5.33655	5.27847
Trial 3	0	0.485107	2.22349	2.84242	3.21904	3.61948	3.97619	5.31961	5.18753
Trial 4	0	0.429428	2.21902	2.69083	3.09566	3.57175	3.86597	5.22381	5.1817
Trial 5	0	0.418539	2.31431	2.80123	3.2701	3.55544	4.0301	5.0842	5.02908
Trial 6	0	0.395823	2.13896	2.67506	3.18486	3.54389	3.93955	5.02778	4.98658
R449	0	0.306231	2.45971	3.17512	3.44385	3.84021	4.20144	5.54088	5.58341
Trial 2	0	0.133859	2.09638	2.63085	3.06205	3.38638	3.85927	4.84012	4.81155
Trial 3	0	0.408279	2.22919	2.7164	3.20081	3.64606	3.96829	5.1571	5.10461
Trial 4	0	0.445766	2.14695	2.59401	3.0489	3.44246	3.75636	5.12347	5.02379
Trial 5	0	0.398503	2.10153	2.60875	3.11123	3.52565	3.87117	5.02591	5.02118
Trial 6	0	0.393748	2.2048	2.73808	3.22517	3.6515	4.02876	5.09871	5.04501
D551	0	1.06305	3.27812	3.81887	4.19667	4.66141	5.03079	6.33242	6.32985
Trial 2	0	0.394776	2.24723	2.75427	3.25537	3.62519	4.06776	5.17318	5.14635
Trial 3	0	0.716981	2.47123	2.83507	3.2798	3.82789	4.06416	5.53621	5.42653
Trial 4	0	0.465064	2.32973	2.85569	3.31827	3.64765	4.12964	5.24343	5.15699
Trial 5	0	0.332154	2.19716	2.69932	3.11849	3.46426	3.90093	5.28019	5.21317
Trial 6	0	0.319611	2.08521	2.59899	3.12236	3.50712	3.88734	4.97702	4.95171
R554	0	0.540658	2.32413	2.83684	3.3473	3.75359	4.10679	5.30214	5.17253
Trial 2	0	0.560427	2.06709	2.51335	3.34597	3.49539	3.79289	5.24638	5.13356
Trial 3	0	0.556559	2.21697	2.71475	3.17453	3.54733	3.90551	5.09027	5.04435
Trial 4	0	0.513385	1.86011	2.37503	2.78973	3.16867	3.50418	4.77796	4.68748
Trial 5	0	0.395993	2.01245	2.39561	2.91099	3.31884	3.64124	4.82657	4.76606
Trial 6	0	0.455797	1.71284	2.21412	2.68801	3.19185	3.44838	4.77616	4.77098
S379	0	0.972478	3.2856	3.81201	4.06396	4.67191	5.20775	5.51704	5.64696
Trial 2	0	0.683562	2.73899	3.32734	3.67824	4.19211	4.72037	5.13795	5.23118
Trial 3	0	0.836786	2.78514	3.27321	3.59753	4.14076	4.65412	5.00722	5.05845
Trial 4	0	0.594849	2.70905	3.29459	3.63646	4.06513	4.57917	5.20623	5.19747
Trial 5	0	0.53333	2.66219	3.13807	3.47674	3.9779	4.46591	4.90666	4.91266
Trial 6	0	0.472216	2.48022	3.02	3.43462	3.86195	4.39557	4.91378	4.88076
H376	0	1.07277	3.28353	3.81683	4.07187	4.74349	5.29341	5.50693	5.59493
Trial 2	0	0.947041	3.18871	3.67577	3.95395	4.65669	5.27036	5.19484	5.21934
Trial 3	0	0.791959	3.10766	3.56655	3.79358	4.56152	5.15014	5.0684	5.04348
Trial 4	0	0.646829	2.97293	3.40779	3.74082	4.44805	5.03372	5.07262	5.0548
Trial 5	0	0.657134	2.85246	3.34455	3.62438	4.32206	4.91996	4.81023	4.87873
Trial 6	0	0.656236	2.92268	3.35552	3.68558	4.44355	5.02194	4.74901	4.80811
Y371	0	0.926486	3.24894	3.90187	4.10057	4.68323	5.1882	5.62763	5.7842
Trial 2	0	0.70714	3.01574	3.58273	3.8043	4.38621	4.9442	5.17884	5.2004
Trial 3	0	0.736986	3.03715	3.56396	3.7923	4.51613	5.05204	5.02222	4.99006
Trial 4	0	0.437598	2.61203	3.13667	3.507	3.90802	4.36888	5.13241	5.13221
Trial 5	0	0.660813	2.97872	3.51441	3.78179	4.33442	4.90626	5.14086	5.12747
Trial 6	0	0.587289	2.73058	3.29021	3.51536	4.0874	4.68192	4.93389	4.93212
V451	0	1.41869	3.91761	4.50394	5.02874	5.79917	5.80694	5.52761	5.56987
Trial 2	0	0.947041	3.18871	3.67577	3.95395	5.41256	5.45153	5.18515	5.22112
Trial 3	0	1.51046	3.63126	4.23211	4.86813	5.39254	5.34894	5.03777	5.06563
Trial 4	0	0.959198	3.40453	3.97465	4.59847	5.26064	5.23408	5.01439	4.99772
Trial 5	0	0.769193	3.28721	3.88346	4.47484	5.00753	4.97576	4.69007	4.70498
Trial 6	0	0.90633	3.34991	4.01032	4.60878	5.01145	5.00269	4.7713	4.7619
WT	0	0.86536	2.63232	3.11877	3.49596	4.02594	4.27989	5.79847	5.80669
Trial 2	0	0.559303	2.60487	3.03436	3.4774	3.81275	4.19687	5.30823	5.33027
Trial 3	0	0.388374	2.06542	2.69638	3.0479	3.50577	3.78565	5.00531	4.99935
Trial 4	0	0.47463	2.07602	2.53885	2.95253	3.49312	3.69503	5.20449	5.19958
Trial 5	0	0.412371	2.17952	2.62646	3.02378	3.48925	3.75278	5.13757	5.12205
Trial 6	0	0.327294	2.11054	2.69627	3.15416	3.53026	3.80478	5.12528	5.12983

## Sheet: Glycine Mutants 3
Doublings (Gly muts)	Hours of Growth
10_9_2014	1	5.75	20.11	21.91	25	26.5	28.91	30.25	34.25	44.15	45.81
L459	0	0.453342	2.1388	2.30721	2.70448	2.90325	3.21421	3.40165	3.83293	4.80663	5.06248
Trial 2	0	-0.182644	1.27094	1.45154	1.88707	2.09413	2.39858	2.53644	3.01665	3.98843	4.24222
Trial 3	0	0.515704	1.91934	2.13173	2.64904	2.77301	3.09852	3.25962	3.72991	4.68514	4.95368
Trial 4	0	0.619472	1.82367	2.11184	2.50322	2.63906	2.95401	3.09283	3.55014	4.43304	4.69472
Trial 5	0	0.402731	1.9382	2.16878	2.51602	2.70823	3.02501	3.20112	3.62562	4.59403	4.86182
Trial 6	0	0.759992	1.82629	2.11373	2.44035	2.64149	2.93882	3.09746	3.50774	4.37858	4.60659
Q338	0	0.795098	2.24304	2.5158	2.96963	3.14889	3.42534	3.62218	4.07704	4.86957	5.14981
Trial 2	0	0.764682	2.06069	2.25794	2.68424	2.92275	3.08974	3.33303	3.84862	4.76344	5.03473
Trial 3	0	0.742134	2.01415	2.24254	2.6747	2.87736	3.14043	3.33929	3.75932	4.69041	4.93626
Trial 4	0	0.798201	2.0721	2.25256	2.65788	2.9119	3.135	3.32569	3.81819	4.76133	5.01342
Trial 5	0	0.801054	1.95717	2.2015	2.62768	2.85373	3.13076	3.30616	3.77239	4.71599	5.00215
Trial 6	0	0.738369	1.83003	2.08168	2.54573	2.7807	3.03326	3.21855	3.70715	4.58521	4.86598
Q339	0	0.943191	2.59933	2.91412	3.54527	3.62974	3.90646	4.23109	4.43183	5.93158	5.99759
Trial 2	0	0.762477	2.25602	2.46845	2.98673	3.27544	3.57892	3.73664	4.08172	5.60102	5.65997
Trial 3	0	0.775691	2.35481	2.60504	3.09688	3.3744	3.66564	3.729	4.08202	5.42425	5.44699
Trial 4	0	0.779946	2.25186	2.52682	2.97271	3.21281	3.54366	3.622	3.97687	5.31431	5.32024
Trial 5	0	0.652115	2.03324	2.44128	2.94467	3.02516	3.32528	3.44548	3.78406	5.15271	5.18223
Trial 6	0	0.353865	1.74708	2.027	2.50732	2.71369	3.08019	3.22975	3.54834	4.99036	5.04602
R449	0	0.900555	2.46494	2.7442	3.19597	3.39154	3.6715	3.87451	4.19649	5.6316	5.71035
Trial 2	0	0.871679	2.23812	2.51559	3.00677	3.2879	3.4522	3.69223	4.04274	5.4672	5.50751
Trial 3	0	0.74124	2.09274	2.38967	2.85829	3.09995	3.44032	3.58086	3.89421	5.2431	5.22343
Trial 4	0	0.595412	1.99877	2.25082	2.73949	3.02731	3.3524	3.52273	3.82933	5.21941	5.25793
Trial 5	0	1.11443	2.2625	2.41041	2.82781	3.0738	3.34874	3.52536	3.98465	4.99737	5.27025
Trial 6	0	0.662044	1.90176	2.21795	2.71158	2.91269	3.24101	3.37908	3.71093	5.10841	5.1577
D551	0	0.880226	2.46373	2.77862	3.21674	3.40726	3.72259	3.91235	4.19551	5.72584	5.77894
Trial 2	0	0.753967	2.03417	2.32727	2.82518	3.35098	3.67617	3.78176	4.16629	5.32954	5.34065
Trial 3	0	0.790212	2.27543	2.48153	3.00583	3.2421	3.58924	3.7565	4.05609	5.48672	5.52532
Trial 4	0	0.900339	2.21387	2.52816	2.9887	3.22843	3.55854	3.6685	4.01962	5.37514	5.40217
Trial 5	0	0.772139	2.16828	2.4789	2.95712	3.23587	3.53993	3.66939	3.99395	5.349	5.37059
Trial 6	0	0.77185	2.14683	2.40959	2.891	3.10822	3.45416	3.53928	3.89684	5.25581	5.28018
R554	0	0.837757	2.32178	2.63668	3.22542	3.24004	3.56289	3.74826	4.10331	5.49166	5.71559
Trial 2	0	0.753967	2.03417	2.32727	2.82518	3.05274	3.34033	3.52289	3.85246	5.30055	5.34727
Trial 3	0	0.70847	2.08773	2.34278	2.86633	3.09723	3.42206	3.60084	3.90145	5.34986	5.38791
Trial 4	0	0.719495	2.14185	2.31145	2.8078	3.02207	3.33002	3.50657	3.90239	5.32108	5.37058
Trial 5	0	0.716047	2.00026	2.31789	2.78941	3.04756	3.36947	3.47206	3.82214	5.15014	5.17794
Trial 6	0	0.772702	2.04457	2.30327	2.79354	3.01031	3.35467	3.54234	3.84429	5.2991	5.33538
S379	0	1.01681	2.70745	2.92226	3.38543	3.64034	3.94574	4.05774	4.41139	5.78932	5.82288
Trial 2	0	0.84502	2.61089	2.83647	3.4531	3.6448	3.70732	3.91927	4.53451	5.48497	5.46947
Trial 3	0	0.824982	2.38581	2.71786	3.27224	3.5804	3.72418	3.80413	4.47953	5.22875	5.27623
Trial 4	0	0.833754	2.4672	2.70423	3.18558	3.49591	3.72288	3.79478	4.34677	5.43189	5.37515
Trial 5	0	0.606815	2.33441	2.63897	3.21477	3.39402	3.62934	3.73873	4.35985	5.25062	5.27884
Trial 6	0	0.655606	2.08854	2.43421	2.9465	3.12751	3.39873	3.51255	4.09801	5.04486	5.06768
H376	0	0.896442	2.8156	3.2067	3.72806	3.88686	4.09015	4.29521	4.97382	5.53286	5.61728
Trial 2	0	0.979517	2.74037	3.02245	3.56553	3.6713	3.88121	4.07343	4.80674	5.2858	5.32312
Trial 3	0	0.835335	2.58745	2.87977	3.40387	3.56608	3.7976	4.00095	4.72764	5.00382	5.05834
Trial 4	0	0.777697	2.55904	2.84203	3.38195	3.56427	3.81565	3.96593	4.7022	5.17863	5.14927
Trial 5	0	0.889344	2.44192	2.80725	3.36905	3.48972	3.73001	3.93478	4.64209	5.17036	5.2127
Trial 6	0	0.229234	2.46694	2.80861	3.37546	3.45454	3.71867	3.92223	4.61067	5.17572	5.2138
Y371	0	0.890236	2.75866	3.12582	3.68648	3.77505	3.98279	4.17792	4.86281	5.47711	5.56211
Trial 2	0	0.830961	2.6104	2.90629	3.51112	3.64148	3.81117	4.02406	4.71587	5.32405	5.32706
Trial 3	0	0.902851	2.59117	2.8951	3.45964	3.6044	3.82228	4.00293	4.69696	5.15497	5.1795
Trial 4	0	0.880421	2.57367	2.85608	3.4122	3.59585	3.78614	3.93066	4.64655	5.28109	5.24031
Trial 5	0	1.0773	2.41068	2.76282	3.33275	3.47077	3.7154	3.8831	4.58158	5.17807	5.21856
Trial 6	0	0.619495	2.31163	2.66378	3.24033	3.37568	3.59206	3.76554	4.43687	5.07232	5.1154
V451	0	1.0629	3.40745	3.63133	3.97157	4.29315	4.83822	5.08004	5.5332	5.39643	5.39946
Trial 2	0	1.01885	3.2035	3.39082	3.81952	4.24742	4.59318	4.97587	5.17811	4.93585	4.99903
Trial 3	0	0.985651	3.21033	3.42517	3.73187	4.07751	4.54539	4.82861	5.36729	5.19871	5.22123
Trial 4	0	0.952348	3.08355	3.31634	3.63875	3.99565	4.42516	4.70997	5.27147	5.0607	5.11298
Trial 5	0	1.0054	3.17676	3.40974	3.72461	4.02519	4.53182	4.80761	5.34403	5.14887	5.19906
Trial 6	0	0.975475	3.13413	3.31109	3.67654	4.01256	4.49397	4.74502	5.26912	5.08673	5.17739
WT	0	0.692491	2.41312	2.74777	3.26048	3.52296	3.79345	3.99533	4.36557	5.6783	5.97248
Trial 2	0	0.74595	2.31747	2.5123	3.03106	3.25519	3.52556	3.68458	4.00355	5.46685	5.50613
Trial 3	0	0.607817	2.16378	2.40014	2.86228	3.10983	3.41961	3.58217	3.90111	5.28103	5.30259
Trial 4	0	0.648958	2.25507	2.51355	3.03014	3.30369	3.5858	3.6664	4.04578	5.37022	5.36253
Trial 5	0	0.768819	2.15577	2.33498	2.82859	3.09699	3.40266	3.57039	3.88039	5.29927	5.33953
Trial 6	0	0.773545	2.11679	2.41564	2.84901	3.08244	3.37375	3.55583	3.87995	5.30778	5.37497
